# Supplementary material for: Disparate temperature-dependent virus – host dynamics for SARS-CoV-2 and SARS-CoV in the human respiratory epithelium
Source: bioRxiv or medRxiv preprint supplement (doi:10.1101/2020.04.27.062315), 2020-12-18

# Supplemental figure 2

**a**

SARS-CoV  
DAPI - Nucleocapsid - Tubulin IV

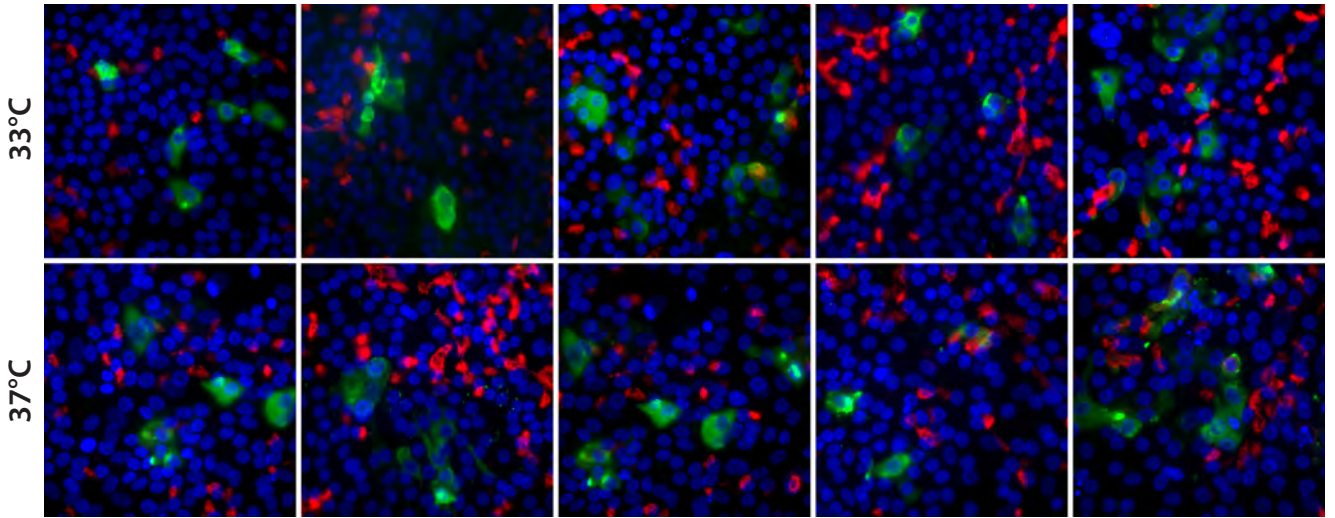

**b**

SARS-CoV-2  
DAPI - Nucleocapsid - Tubulin IV

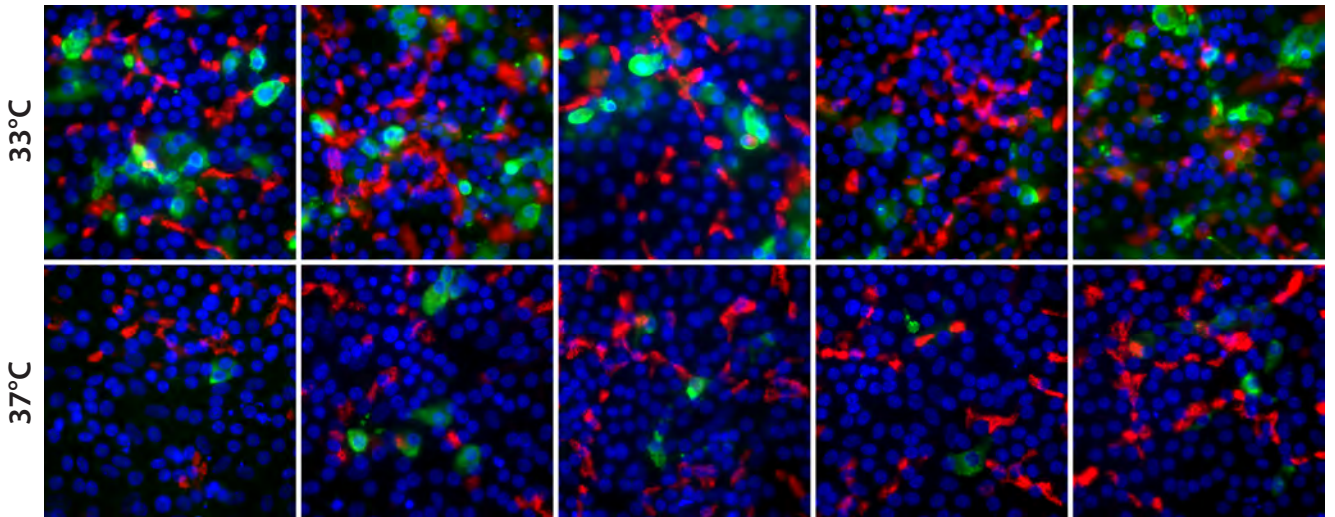

Supplement: Supplementary file [file media-3.pdf]
