# Supplementary material for: Disparate temperature-dependent virus – host dynamics for SARS-CoV-2 and SARS-CoV in the human respiratory epithelium
Source: bioRxiv or medRxiv preprint supplement (doi:10.1101/2020.04.27.062315), 2020-12-18

# Supplemental figure 3

a

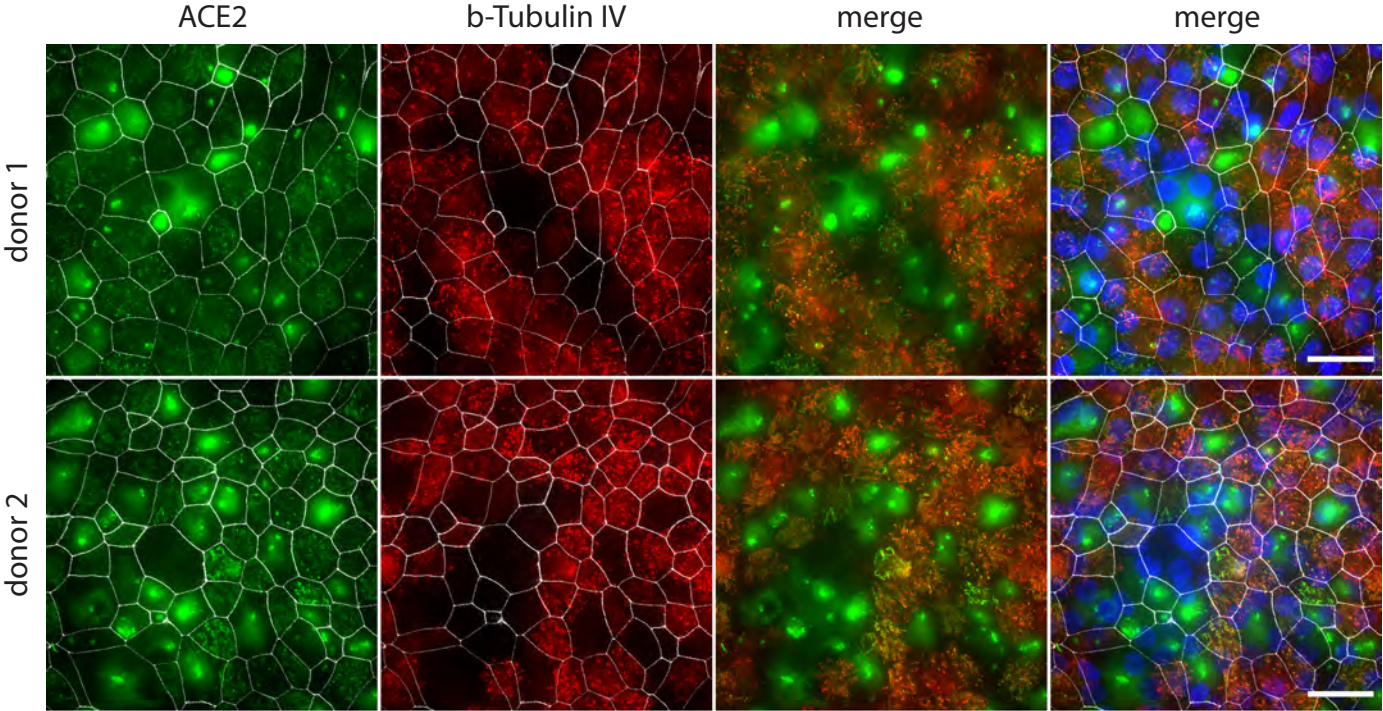

b

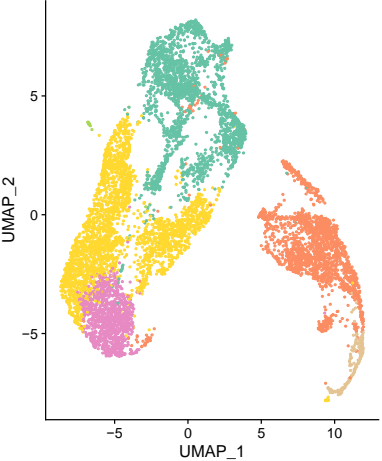

c

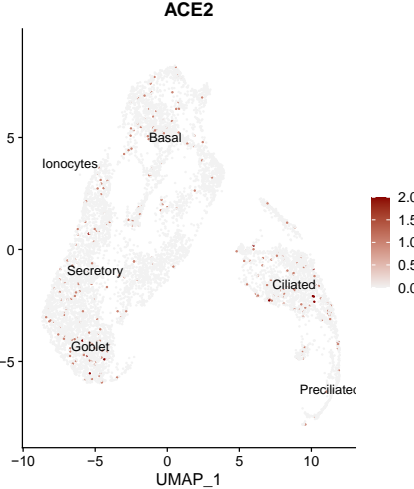

d

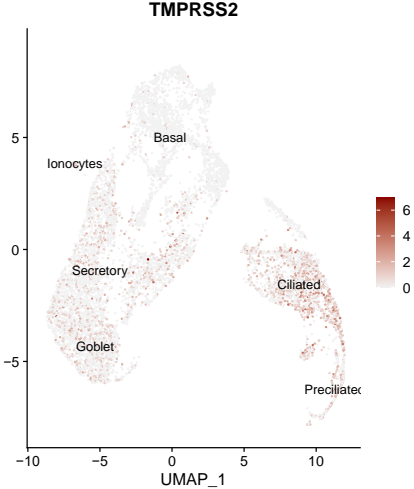

Supplement: Supplementary file [file media-4.pdf]
