# Supplementary material for: Disparate temperature-dependent virus – host dynamics for SARS-CoV-2 and SARS-CoV in the human respiratory epithelium
Source: bioRxiv or medRxiv preprint supplement (doi:10.1101/2020.04.27.062315), 2020-12-18

# Supplemental figure 4

**a**

SARS-CoV DEGs at 33°C

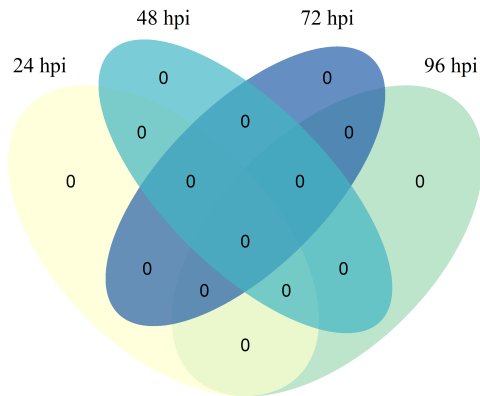

**b**

SARS-CoV DEGs at 37°C

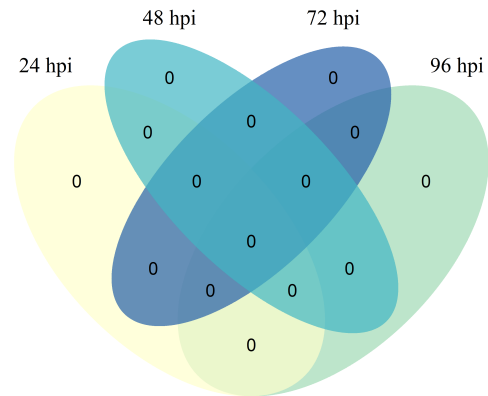

**c**

SARS-CoV-2 vs SARS-CoV DEGs at 33°C

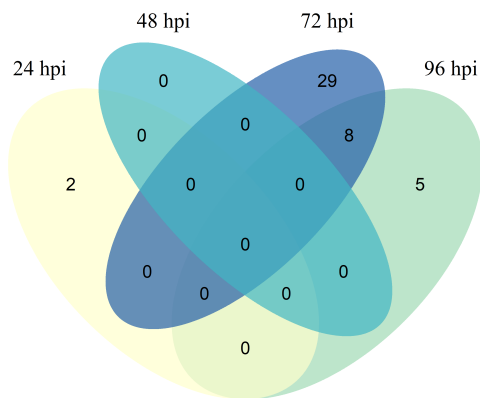

**d**

SARS-CoV-2 vs SARS-CoV DEGs at 37°C

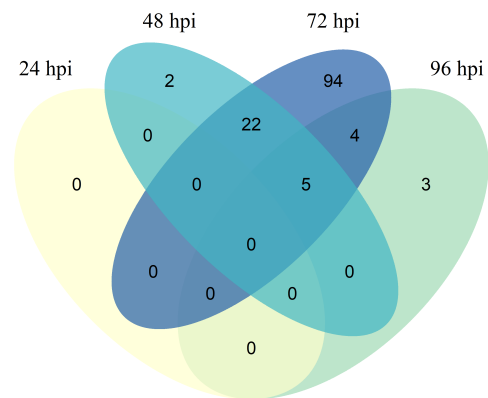

Supplement: Supplementary file [file media-5.pdf]
